# Supplementary material
Source: ML conference proceedings conference paper supplement (https://openreview.net/forum?id=nCANqNLlE7)
Supplement: supplementary_material [file attachment]

755

## Supplementary Material

Table 4. For each configuration and metric: best-performing method and its margin over next-best in percentage points ( $\Delta$ ). Clear 1-Con wins (non-ties) highlighted in green.

| Exp | Gallery Structure   |        | Image Quality |         | ING Recall  |          | OOG Recall |          | Accuracy |          | MDD, Acc |          |
|-----|---------------------|--------|---------------|---------|-------------|----------|------------|----------|----------|----------|----------|----------|
|     | Images/ID           | Dem    | Probe         | Gallery | Best        | $\Delta$ | Best       | $\Delta$ | Best     | $\Delta$ | Best     | $\Delta$ |
| 1   | Controlled          | Single | M             | M       | 1-Con       | 0.13     | Score      | 0.03     | Score    | 0.16     | Score    | 0.86     |
| 2   | Controlled          | Single | Blur          | M       | 1-Con       | 16.5     | Score      | 0.3      | 1-Con    | 6.35     | 1-Con    | 4.5      |
|     |                     |        | Res           | M       | 1-Con       | 16.6     | Score      | 0.3      | 1-Con    | 6.3      | 1-Con    | 2.35     |
|     |                     |        | M             | Blur    | 1-Con       | 6.4      | Score      | 0.2      | 1-Con    | 4.85     | 1-Con    | 6.3      |
|     |                     |        | M             | Res     | 1-Con       | 14.4     | Score      | 0.2      | 1-Con    | 5.25     | 1-Con    | 6.55     |
|     |                     |        | Blur          | Blur    | Score       | 13.4     | Gap        | 9.3      | 1-Con    | 1.65     | 1-Con    | 3.25     |
|     |                     |        | Res           | Res     | Score       | 7.4      | Gap        | 8.3      | 1-Con    | 2.35     | 1-Con    | 3.85     |
| 3   | Semi-<br>Controlled | Multi  | M             | M       | 1Con, Score | 0.4      | Gap        | 0.3      | Score    | 0.05     | Score    | 0.6      |
|     |                     |        | Res           | M       | 1-Con       | 15.4     | Score      | 0.1      | 1-Con    | 5.9      | 1-Con    | 5.75     |
| 4   | Uncontrolled        | Single | M             | M       | 1Con, Score | 0.1      | Gap        | 3.5      | Gap      | 1.7      | —        | —        |
|     |                     |        | Res           | M       | 1-Con       | 16       | Gap        | 0.2      | 1-Con    | 6.6      | —        | —        |
| 5   | Uncontrolled        | Multi  | Res           | M       | 1-Con       | 15.8     | Score      | 0.1      | 1-Con    | 6.55     | —        | —        |
|     |                     |        | S             | M       | —           | —        | All        | 0.0      | —        | —        | —        | —        |

Table 5. For each configuration and metric: worst-performing method and its margin over next-best in percentage points ( $\Delta$ ). Clear 1-Con losses highlighted in red.

| Exp | Gallery Structure   |        | Image Quality |         | ING Recall |          | OOG Recall |          | Accuracy |          | MDD, Acc |          |
|-----|---------------------|--------|---------------|---------|------------|----------|------------|----------|----------|----------|----------|----------|
|     | Images/ID           | Dem    | Probe         | Gallery | Worst      | $\Delta$ | Worst      | $\Delta$ | Worst    | $\Delta$ | Worst    | $\Delta$ |
| 1   | Controlled          | Single | M             | M       | Gap        | 0.29     | 1-Con      | 7.32     | 1-Con    | 3.45     | 1-Con    | 0.12     |
| 2   | Controlled          | Single | Blur4         | M       | Score      | 26.7     | 1-Con      | 3.8      | Score    | 13.2     | Gap      | 0.45     |
|     |                     |        | Res18         | M       | Score      | 23.5     | 1-Con      | 4.0      | Score    | 11.6     | Gap      | 3.55     |
|     |                     |        | M             | Blur4   | Score      | 32.9     | 1-Con      | 3.8      | Score    | 16.35    | Score    | 2.95     |
|     |                     |        | M             | Res18   | Score      | 27.5     | 1-Con      | 3.9      | Score    | 13.65    | Score    | 0.4      |
|     |                     |        | Blur4         | Blur4   | Gap        | 12.6     | Score      | 59.0     | Score    | 21.15    | Score    | 8.15     |
|     |                     |        | Res18         | Res18   | Gap        | 13.0     | Score      | 27.5     | Score    | 7.7      | Score    | 14.2     |
| 3   | Semi-<br>Controlled | Multi  | M             | M       | Gap        | 0.4      | 1-Con      | 6.7      | 1-Con    | 3.3      | Gap      | 0.2      |
|     |                     |        | Res18         | M       | Score      | 18.0     | 1-Con      | 3.6      | Score    | 8.95     | Score    | 0.55     |
| 4   | Uncontrolled        | Single | M             | M       | Gap        | 0.1      | 1-Con      | 1.9      | 1-Con    | 0.95     | —        | —        |
|     |                     |        | Res18         | M       | Gap        | 4.7      | 1-Con      | 2.8      | Gap      | 2.25     | —        | —        |
| 5   | Uncontrolled        | Multi  | Res18         | M       | Score      | 13.2     | 1-Con      | 2.7      | Score    | 6.55     | —        | —        |
|     |                     |        | S             | M       | —          | —        | All        | 0.0      | —        | —        | —        | —        |

Table 6. Per-demographic and average performance metrics for the three classification methods.

| Exp  | Gallery Structure |        | Image Quality |         | Group | ING Recall |       |       | OOG Recall |       |       | Accuracy |       |       |       |
|------|-------------------|--------|---------------|---------|-------|------------|-------|-------|------------|-------|-------|----------|-------|-------|-------|
|      | Images/ID         | Dem    | Probe         | Gallery |       | 1-Con      | Score | Gap   | 1-Con      | Score | Gap   | 1-Con    | Score | Gap   |       |
| 1    | Controlled        | Single | M             | M       | BLF   | 99.79      | 99.44 | 99.32 | 93.59      | 99.18 | 99.68 | 96.69    | 99.31 | 99.50 |       |
|      |                   |        |               |         | BLM   | 100        | 99.94 | 99.97 | 92.06      | 99.74 | 99.65 | 96.03    | 99.84 | 99.81 |       |
|      |                   |        |               |         | WHF   | 99.47      | 99.82 | 98.35 | 89.76      | 97.68 | 97.38 | 94.62    | 98.75 | 97.87 |       |
|      |                   |        |               |         | WHM   | 99.97      | 99.50 | 99.91 | 91.68      | 99.88 | 99.65 | 95.83    | 99.69 | 99.78 |       |
|      |                   |        |               |         | Avg   | 99.81      | 99.68 | 99.39 | 91.77      | 99.12 | 99.09 | 95.79    | 99.40 | 99.24 |       |
| 2    | Controlled        | Single | Blur          | M       | BLF   | 77.20      | 45.40 | 54.30 | 96.80      | 99.90 | 100   | 87.00    | 72.65 | 77.15 |       |
|      |                   |        |               |         | BLM   | 93.10      | 59.40 | 80.20 | 96.80      | 100   | 99.90 | 94.95    | 79.70 | 90.05 |       |
|      |                   |        |               |         | WHF   | 90.10      | 34.80 | 74.50 | 94.00      | 99.70 | 98.80 | 92.05    | 67.25 | 86.65 |       |
|      |                   |        |               |         | WHM   | 91.10      | 39.10 | 76.60 | 95.60      | 100   | 99.90 | 93.35    | 69.55 | 88.25 |       |
|      |                   |        |               |         | Avg   | 87.90      | 44.70 | 71.40 | 95.80      | 99.90 | 99.60 | 91.85    | 72.30 | 85.50 |       |
|      |                   |        |               |         | Res   | BLF        | 75.80 | 47.00 | 52.40      | 96.60 | 99.90 | 99.90    | 86.20 | 73.45 | 76.15 |
|      |                   |        |               |         |       | BLM        | 91.60 | 58.60 | 76.90      | 95.90 | 100   | 99.90    | 93.75 | 79.30 | 88.40 |
|      |                   |        |               |         |       | WHF        | 89.80 | 39.20 | 73.70      | 94.50 | 99.60 | 98.70    | 92.15 | 69.40 | 86.20 |
|      |                   |        |               |         |       | WHM        | 91.80 | 43.40 | 79.30      | 95.50 | 100   | 99.90    | 93.65 | 71.70 | 89.60 |
|      |                   |        |               |         |       | Avg        | 87.20 | 47.10 | 70.60      | 95.60 | 99.90 | 99.60    | 91.40 | 73.50 | 85.10 |
|      |                   |        |               |         |       | Blur       | BLF   | 84.80 | 44.70      | 64.10 | 96.70 | 100      | 100   | 90.75 | 72.35 |
|      |                   |        |               |         | BLM   |            | 97.00 | 65.00 | 88.40      | 96.20 | 100   | 100      | 96.60 | 82.50 | 94.20 |
|      |                   |        | WHF           | 92.10   | 35.10 |            | 78.70 | 94.40 | 99.70      | 98.80 | 93.25 | 67.40    | 88.75 |       |       |
|      |                   |        | WHM           | 94.60   | 37.80 |            | 83.10 | 96.30 | 100        | 99.90 | 95.45 | 68.90    | 91.50 |       |       |
|      |                   |        | Avg           | 92.10   | 45.70 |            | 78.60 | 95.90 | 99.90      | 99.70 | 94.00 | 72.80    | 89.15 |       |       |
|      |                   |        | Res           | BLF     | 83.40 |            | 48.70 | 61.40 | 97.10      | 100   | 99.90 | 90.25    | 74.35 | 80.65 |       |
|      |                   |        |               | BLM     | 96.00 |            | 65.60 | 85.50 | 95.50      | 100   | 99.90 | 95.75    | 82.80 | 92.70 |       |
|      |                   |        |               | WHF     | 92.20 |            | 41.00 | 78.60 | 94.50      | 99.70 | 99.00 | 93.35    | 70.35 | 88.80 |       |
|      |                   |        |               | WHM     | 94.80 |            | 43.50 | 83.20 | 95.90      | 100   | 99.90 | 95.35    | 71.75 | 91.55 |       |
|      |                   |        |               | Avg     | 91.60 |            | 49.70 | 77.20 | 95.80      | 99.90 | 99.70 | 93.70    | 74.80 | 88.45 |       |
|      |                   |        |               | Blur    | BLF   |            | 73.30 | 97.40 | 56.90      | 91.40 | 11.80 | 99.60    | 82.35 | 54.60 | 78.25 |
|      |                   |        | BLM           |         | 89.40 |            | 98.70 | 78.30 | 90.10      | 18.00 | 99.50 | 89.75    | 58.35 | 88.90 |       |
|      |                   |        | WHF           |         | 86.30 | 96.30      | 74.90 | 88.90 | 42.70      | 98.50 | 87.60 | 69.50    | 86.70 |       |       |
|      |                   |        | WHM           |         | 85.50 | 95.50      | 73.90 | 89.80 | 51.30      | 99.50 | 87.65 | 73.40    | 86.70 |       |       |
|      |                   |        | Avg           |         | 83.60 | 97.00      | 71.00 | 90.00 | 31.00      | 99.30 | 86.80 | 64.00    | 85.15 |       |       |
|      |                   |        | Res           |         | BLF   | 73.70      | 93.10 | 56.40 | 92.20      | 34.10 | 99.80 | 82.95    | 63.60 | 78.10 |       |
|      |                   |        |               |         | BLM   | 87.10      | 94.90 | 75.50 | 91.10      | 53.90 | 99.70 | 89.10    | 74.40 | 87.60 |       |
|      |                   |        |               |         | WHF   | 86.80      | 90.10 | 74.70 | 90.40      | 77.40 | 98.50 | 88.60    | 83.75 | 86.60 |       |
|      |                   |        |               |         | WHM   | 87.50      | 86.50 | 76.60 | 90.70      | 89.10 | 99.60 | 89.10    | 87.80 | 88.10 |       |
|      |                   |        |               |         | Avg   | 83.80      | 91.20 | 70.80 | 91.10      | 63.60 | 99.40 | 87.45    | 77.40 | 85.10 |       |
| Blur | BLF               | 99.90  |               |         | 99.80 | 99.60      | 93.20 | 98.20 | 99.60      | 96.55 | 99.00 | 99.60    |       |       |       |
|      | BLM               | 100    | 100           |         | 100   | 92.80      | 99.30 | 99.50 | 96.40      | 99.65 | 99.75 |          |       |       |       |
|      | WHF               | 99.60  | 100           | 98.60   | 90.20 | 97.60      | 97.40 | 94.90 | 98.80      | 98.00 |       |          |       |       |       |
|      | WHM               | 100    | 99.80         | 99.90   | 92.30 | 99.90      | 99.80 | 96.15 | 99.85      | 99.85 |       |          |       |       |       |
|      | Avg               | 99.90  | 99.90         | 99.50   | 92.10 | 98.80      | 99.10 | 96.00 | 99.35      | 99.30 |       |          |       |       |       |
|      | Res               | BLF    | 78.10         | 55.50   | 55.30 | 96.70      | 99.90 | 99.90 | 87.40      | 77.70 | 77.60 |          |       |       |       |
|      |                   | BLM    | 94.10         | 71.70   | 82.10 | 96.60      | 99.90 | 100   | 95.35      | 85.80 | 91.05 |          |       |       |       |
|      |                   | WHF    | 91.30         | 43.60   | 75.50 | 94.80      | 99.50 | 98.80 | 93.05      | 71.55 | 87.15 |          |       |       |       |
|      |                   | WHM    | 93.60         | 52.90   | 82.60 | 96.20      | 100   | 100   | 94.90      | 76.45 | 91.30 |          |       |       |       |
|      |                   | Avg    | 89.30         | 55.90   | 73.90 | 96.10      | 99.80 | 99.70 | 92.70      | 77.85 | 86.80 |          |       |       |       |
|      |                   | 4      | Uncontrolled  | Single  | M     | M          | BLM   | 100   | 100        | 99.90 | 94.20 | 96.10    | 99.60 | 97.10 | 98.05 |
|      | Res               |        |               |         | BLM   |            | 87.90 | 71.90 | 67.20      | 96.90 | 99.70 | 99.90    | 92.40 | 85.80 | 83.55 |
| S    | All               |        |               |         | 91.30 |            | 62.30 | 75.50 | 97.20      | 100   | 99.90 | 94.25    | 81.15 | 87.70 |       |
| 5    | Uncontrolled      | Multi  | Res           | M       | All   | —          | —     | —     | 100        | 100   | 100   | 100      | 100   | 100   |       |
|      |                   |        | S             |         | All   | —          | —     | —     | 100        | 100   | 100   | 100      | 100   | 100   |       |

Table 7. Distributional separation (EMD) between ING and OOG distributions for each classification method. Higher values indicate better separation.  $\Delta$  shows percentage change from baseline (Exp. 1).

| Exp | Gal Comp |        | Degradation |     | 1-Consistency |          | Score-Threshold |          | Gap-Threshold |          |
|-----|----------|--------|-------------|-----|---------------|----------|-----------------|----------|---------------|----------|
|     | N Imgs   | N Dems | Prb         | Gal | EMD           | $\Delta$ | EMD             | $\Delta$ | EMD           | $\Delta$ |
| 1   | 2        | 1      | —           | —   | 2.982         | —        | 0.399           | —        | 0.376         | —        |
| 2   | 2        | 1      | BL          | —   | 3.452         | +15.8%   | 0.145           | -63.6%   | 0.126         | -66.3%   |
|     |          |        | RE          | —   | 3.359         | +12.6%   | 0.146           | -63.3%   | 0.127         | -66.1%   |
|     |          |        | —           | BL  | 3.555         | +19.2%   | 0.159           | -60.1%   | 0.141         | -62.4%   |
|     |          |        | —           | RE  | 3.494         | +17.2%   | 0.159           | -60.3%   | 0.140         | -62.7%   |
|     |          |        | BL          | BL  | 2.306         | -22.7%   | 0.171           | -57.2%   | 0.148         | -60.5%   |
|     |          |        | RE          | RE  | 2.405         | -19.4%   | 0.170           | -57.3%   | 0.148         | -60.6%   |
| 3   | 2-17     | 4      | —           | —   | 3.057         | +2.5%    | 0.409           | +2.3%    | 0.385         | +2.6%    |
|     |          |        | RE          | —   | 3.499         | +17.3%   | 0.150           | -62.3%   | 0.132         | -64.9%   |
| 4   | 1-108    | 1      | —           | —   | 3.370         | +13.0%   | 0.383           | -4.0%    | 0.364         | -3.2%    |
|     |          |        | RE          | —   | 3.844         | +28.9%   | 0.129           | -67.7%   | 0.112         | -70.1%   |
| 5   | 1-108    | 6      | RE          | —   | 3.761         | +26.1%   | 0.149           | -62.7%   | 0.132         | -64.9%   |
